# Supplementary material
Source: PubMed Central journal article supplement (PMC2724772)
Supplement: supp_M800509-JLR200_Supplemental_Data.pdf [file supp_M800509-JLR200_Supplemental_Data.pdf]

**Supplemental Table 1.** Differentially-expressed miRNAs in livers of ob/ob mice compared with that of C57BL/6 mice, segregated by gender.

| miRNA                                     | SAM score | Fold Change | <i>q</i> -value(%) <sup>a</sup> |
|-------------------------------------------|-----------|-------------|---------------------------------|
| Male ob/ob mice vs. male C57BL/6 mice     |           |             |                                 |
| Up-regulated                              |           |             |                                 |
| mmu-miR-34a                               | 4.52      | 3.23        | 0.00                            |
| mmu-miR-107                               | 3.16      | 2.84        | 0.00                            |
| mmu-miR-15b                               | 3.13      | 2.36        | 0.00                            |
| mmu-miR-31                                | 2.98      | 2.41        | 0.00                            |
| mmu-miR-152                               | 2.82      | 2.15        | 0.00                            |
| mmu-miR-103                               | 2.76      | 2.26        | 0.00                            |
| mmu-miR-221                               | 2.51      | 2.32        | 0.00                            |
| mmu-miR-222                               | 2.22      | 2.86        | 0.00                            |
| mmu-miR-335-5p                            | 1.94      | 2.08        | 0.00                            |
| Down-regulated                            |           |             |                                 |
| mmu-miR-21                                | -3.38     | 0.25        | 0.00                            |
| mmu-miR-101                               | -2.87     | 0.20        | 0.00                            |
| mmu-miR-30e                               | -2.75     | 0.42        | 0.00                            |
| mmu-miR-451                               | -2.49     | 0.39        | 0.00                            |
| mmu-miR-29c                               | -2.43     | 0.37        | 0.00                            |
| mmu-miR-215                               | -2.27     | 0.43        | 0.00                            |
| mmu-miR-130b                              | -1.96     | 0.32        | 0.00                            |
| mmu-miR-1                                 | -1.84     | 0.37        | 0.00                            |
| mmu-miR-19a                               | -1.61     | 0.47        | 0.00                            |
| mmu-miR-122 <sup>b</sup>                  | -1.29     | 0.61        | 0.00                            |
| Female ob/ob mice vs. female C57BL/6 mice |           |             |                                 |
| Up-regulated                              |           |             |                                 |
| mmu-miR-31                                | 6.99      | 3.68        | 0.00                            |
| mmu-miR-193                               | 6.15      | 3.75        | 0.00                            |
| mmu-miR-153                               | 5.78      | 3.16        | 0.00                            |
| mmu-miR-26b                               | 5.62      | 2.27        | 0.00                            |
| mmu-miR-34a                               | 5.26      | 3.42        | 0.00                            |
| mmu-miR-103                               | 4.77      | 2.67        | 0.00                            |
| mmu-miR-296-5p                            | 4.62      | 3.63        | 0.00                            |

|                 |       |      |      |
|-----------------|-------|------|------|
| mmu-miR-20a     | 4.47  | 2.11 | 0.00 |
| mmu-miR-19a     | 4.34  | 2.86 | 0.00 |
| mmu-miR-98      | 4.24  | 2.05 | 0.00 |
| mmu-miR-126-3p  | 3.92  | 2.03 | 0.00 |
| mmu-miR-106a    | 3.64  | 2.44 | 0.00 |
| mmu-miR-194     | 3.52  | 2.67 | 0.00 |
| mmu-miR-30d     | 3.28  | 2.18 | 0.00 |
| mmu-miR-335-5p  | 3.17  | 3.35 | 0.00 |
| mmu-let-7i      | 3.14  | 2.06 | 0.00 |
| mmu-miR-203     | 2.98  | 2.10 | 0.00 |
| mmu-miR-200a    | 2.96  | 3.03 | 0.00 |
| mmu-miR-107     | 2.74  | 2.18 | 0.00 |
| Down-regulated  |       |      |      |
| mmu-miR-125b-5p | -6.67 | 0.35 | 0.00 |
| mmu-miR-100     | -4.54 | 0.40 | 0.00 |
| mmu-miR-191     | -4.11 | 0.40 | 0.00 |
| mmu-miR-23a     | -2.95 | 0.49 | 0.00 |

<sup>a</sup> *q*-value: false discovery rate, the expected percentage of genes identified by chance.

<sup>b</sup> These miRNAs were not considered as significantly changed by SAM due to insufficient fold-change, but proved to be significantly changed by real-time qRT-PCR.

**Supplemental Table 2.** Differentially-expressed miRNAs in livers of STZ-induced diabetic mice compared with that of C57BL/6 mice and in livers of ob/ob mice compared with that of STZ-induced diabetic mice, segregated by gender.

| miRNA                                                | SAM score | Fold Change | <i>q</i> -value(%) <sup>a</sup> |
|------------------------------------------------------|-----------|-------------|---------------------------------|
| Male STZ-induced diabetic mice vs. male C57BL/6 mice |           |             |                                 |
| Up-regulated                                         |           |             |                                 |
| mmu-miR-34a                                          | 6.20      | 5.93        | 0.00                            |
| mmu-miR-222                                          | 2.13      | 2.52        | 0.00                            |
| mmu-miR-200a                                         | 2.04      | 2.07        | 0.00                            |
| Down-regulated                                       |           |             |                                 |
| mmu-miR-451                                          | -2.29     | 0.48        | 0.00                            |
| mmu-miR-122 <sup>b</sup>                             | -0.92     | 0.72        | 0.00                            |
| Male ob/ob mice vs. male STZ-induced diabetic mice   |           |             |                                 |
| Up-regulated                                         |           |             |                                 |
| mmu-miR-103                                          | 5.16      | 2.62        | 0.00                            |
| mmu-miR-107                                          | 3.99      | 2.84        | 0.00                            |
| mmu-miR-31                                           | 3.65      | 2.39        | 0.00                            |
| mmu-let-7i                                           | 3.54      | 2.01        | 0.00                            |
| mmu-miR-221                                          | 2.89      | 2.11        | 0.00                            |
| Down-regulated                                       |           |             |                                 |
| mmu-miR-100                                          | -2.59     | 0.50        | 0.00                            |
| mmu-miR-29c                                          | -2.41     | 0.41        | 0.00                            |
| mmu-miR-21                                           | -2.36     | 0.46        | 0.00                            |
| mmu-miR-130b                                         | -2.18     | 0.44        | 0.00                            |
| mmu-miR-215                                          | -1.83     | 0.44        | 0.00                            |
| mmu-miR-101a                                         | -1.75     | 0.43        | 0.00                            |

<sup>a</sup> *q*-value: false discovery rate, the expected percentage of genes identified by chance.

<sup>b</sup> These miRNAs were not considered as significantly changed by SAM due to insufficient fold-change, but proved to be significantly changed by real-time qRT-PCR.

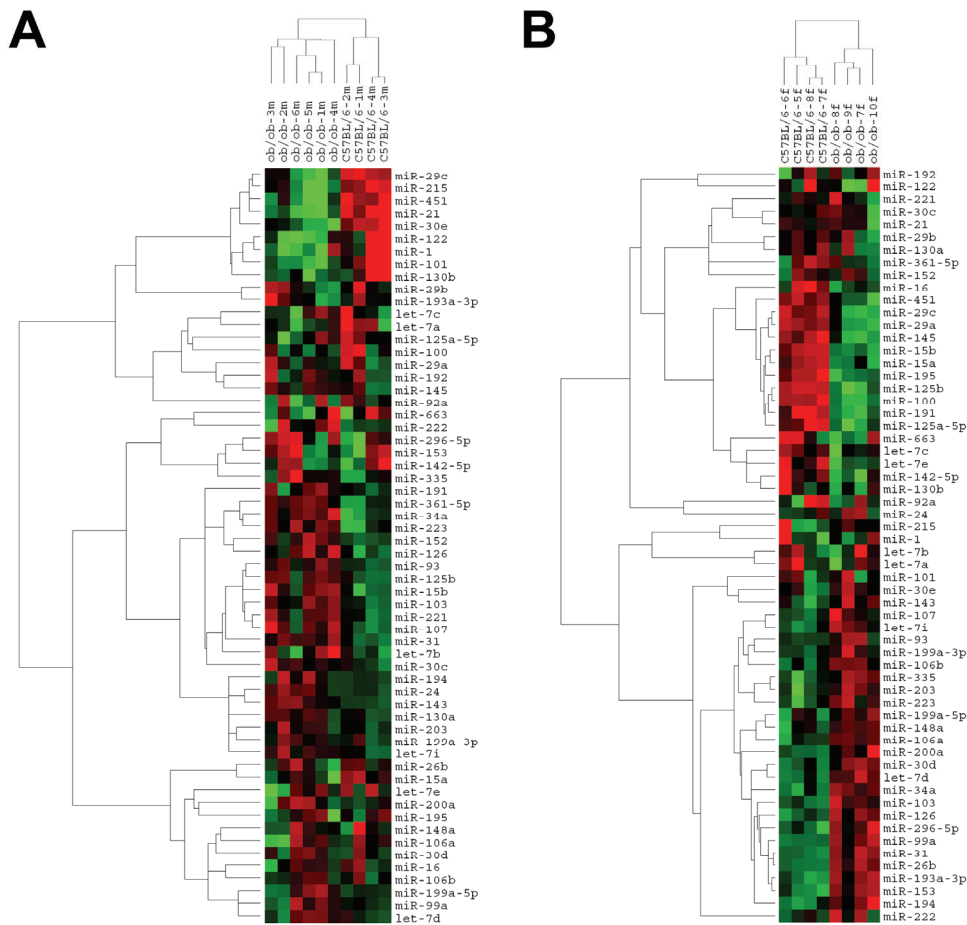

**Supplemental Figure 1.** Hierarchical cluster analysis of miRNAs in livers of ob/ob mice versus C57BL/6 mice, segregated by gender. Two-way (genes against samples) unsupervised hierarchical cluster of a set of 60 most varied miRNAs in livers of 6 male ob/ob mice and 4 male C57BL/6 mice (A) and in livers of 4 female ob/ob mice and 4 female C57BL/6 mice (B). Sample dendrograms generated by cluster analysis show clear separation of ob/ob mice samples from that of C57BL/6 mice based on the miRNA signature. Mean centered signal intensities of miRNA-expression are depicted by a log-transform (2 scale). Color areas indicate relative expression of each miRNA compared to the miRNA median expression (red, above; green, below; and black, close to the median value). m, male; f, female.

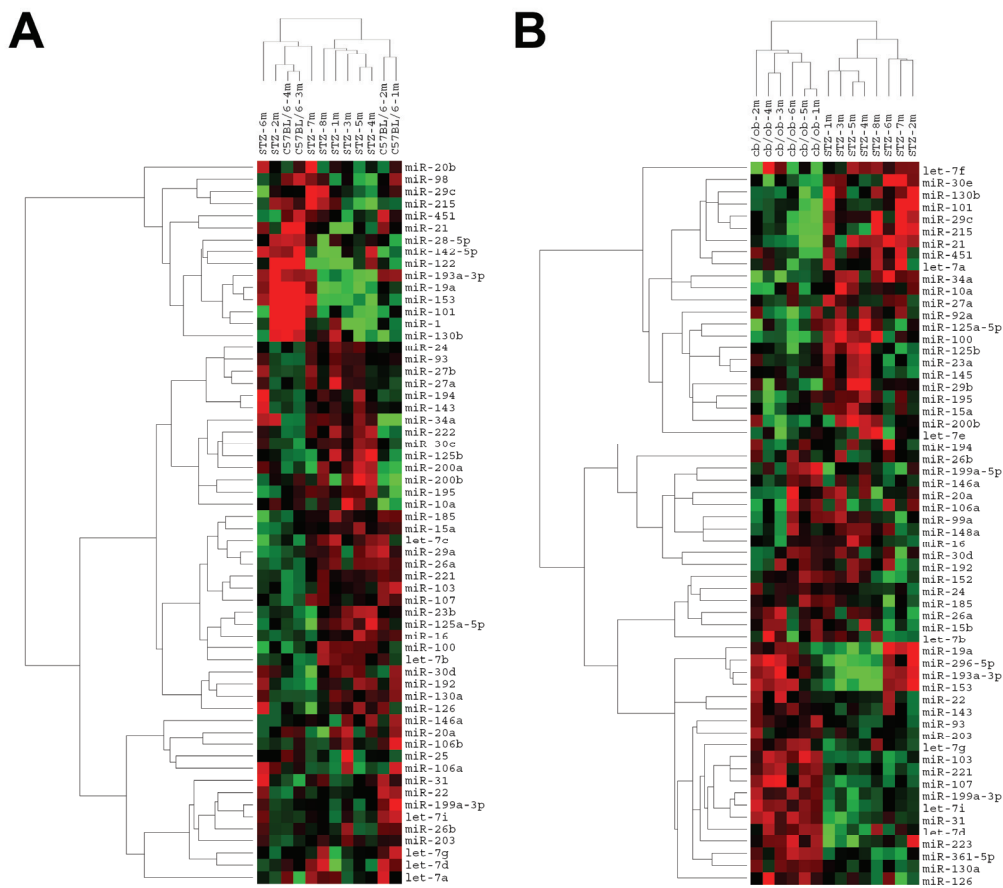

**Supplemental Figure 2.** Hierarchical cluster analysis of miRNAs in livers of STZ-induced diabetic mice versus C57BL/6 mice and in livers of ob/ob mice versus STZ-induced diabetic mice, segregated by gender. (A) Two-way (genes against samples) unsupervised hierarchical cluster of a set of 60 miRNAs with most variation in livers of STZ-induced diabetic mice and C57BL/6 mice. Sample dendrogram shows no clear separation between STZ samples and C57BL/6 samples based on the miRNA signature. 8 male STZ-induced diabetic mice and 4 male C57BL/6 mice are used. (B) Unsupervised hierarchical cluster of most altered miRNAs in livers of ob/ob mice and STZ-induced diabetic mice. Sample dendrogram generated by cluster analysis shows a clear separation of ob/ob mice samples from that of STZ-induced diabetic mice based on the miRNA signature. 6 male ob/ob mice and 8 male STZ-induced diabetic mice are used. Mean centered signal intensities of miRNA-expression are depicted by a log-transform (2 scale). Color areas indicate relative expression of each miRNA compared to the miRNA median expression (red, above; green, below; and black, close to the median value). m, male.
